# Supplementary material for: REDD1 promotes obesity-induced metabolic dysfunction via atypical NF-κB activation
Source: PubMed Central journal article supplement (PMC9588012; doi:10.1038/s41467-022-34110-1), 2022-10-22
Supplement: 41467_2022_34110_MOESM1_ESM.pdf [file 41467_2022_34110_MOESM1_ESM.pdf]

## **SUPPLEMENTAL INFORMATION**

**REDD1 promotes obesity-induced metabolic dysfunction via atypical  
NF- $\kappa$ B activation**

**Supplementary Table 1. List of qRT-PCR primers**

| Genes        | Forward primer sequence   | Reverse primer sequence   |
|--------------|---------------------------|---------------------------|
| <i>Ccl2</i>  | GCTGCTACTCATTACACCAGCA    | ACAGACCTCTCTCTTGAGCTTGG   |
| <i>Tnfa</i>  | CGACGTGGAACCTGGCAGAA      | AGTTCAGTAGACAGAAGAGCGTGGT |
| <i>Il1b</i>  | GTTGACGGACCCCAAAGAT       | TGATACTGCCTGCCTGAAGC      |
| <i>Il6</i>   | AGAGGAGACTTCACAGAGGATACCA | TTGCCATTGCACAACCTCTTTTC   |
| <i>Pparg</i> | GAGATTCTCCTGTTGACCCA      | TCTCCATCACGGAGAGGT        |
| <i>Cebpa</i> | CTTCTACGAGGTGGAGCC        | TCTATAGACGTCTCGTGCTC      |
| <i>aP2</i>   | ACAAGGAAAGTGGCAGGC        | TTCACCTTCCTGTCTGTCTG      |
| <i>Acc</i>   | GCCTCTTCCTGACAAACGAG      | TGACTGCCGAAACATCTCTG      |
| <i>Fasn</i>  | CCCTTGATGAAGAGGGATCA      | ACTCCACAGGTGGGAACAAG      |
| <i>Scd-1</i> | TGCCCTGCGGATCTT           | GCCCATTTCGTACACGTCATT     |
| <i>G6pc</i>  | ATCTGGTTCATCTTAAAGAGAC    | TGCCACCCAGAGGAGATTGATG    |
| <i>Pck1</i>  | GACTTCTCTGCCAAGGTCATCCA   | GCCATCGCAGATGTGGATATA     |
| <i>Fbp1</i>  | TATCAGCACCTGACCCGCTTC     | CGATACCATAGAGCTGTGCGAT    |
| <i>Socs3</i> | GGACCAAGAACCTACGCATCCA    | CACCAGCTTGAGTACACAGTCG    |
| <i>Gapdh</i> | CAAATGGTGAAGGTCGGTG       | GAGGTCAATGAAGGGGTCGT      |

**Supplementary Table 2. List of PCR primers for Chip assay**

| # of NF-kB site | Forward primer sequence | Reverse primer sequence | Product size (bp) |
|-----------------|-------------------------|-------------------------|-------------------|
| #1,2            | GCCTTGGCCATCAACCCAA     | CCTGAAGTAGGCAGGAAGTCTC  | 228               |
| #2              | TGGGGAAAGGCTTTTCTTCCTTA | CCACTGCGGCTGACTGAAA     | 114               |
| #3,4            | TGTCAGCCTCCTGCTAATGTC   | AGCCGAGAGGAATCTTCAGTC   | 136               |
| #5              | AGACTGAAGATTCTCTCGGC    | CTGGTGTGAGCAGAGGATCG    | 104               |
| #6              | GAGCTACCGAGATTAGTGCC    | AACTTGAATCGGGGACTGTG    | 98                |

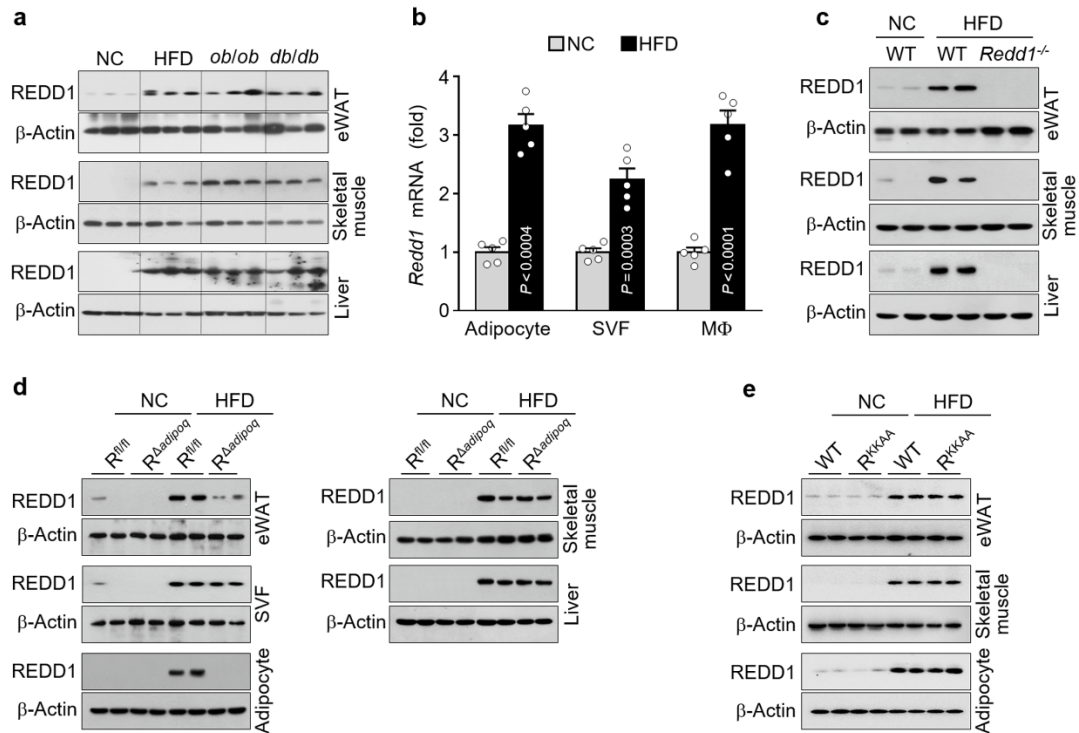

**Supplementary Fig. 1. REDD1 expression in obese mice.** **a**, Representative images of western blots showing REDD1 expression in the eWAT, skeletal muscle, and liver of *ob/ob*, *db/db*, and C57BL/6 mice fed NC or HFD for 16 weeks ( $n = 3$ ). **b**, qRT-PCR-based quantification of *Redd1* in adipocytes, stromal vascular fraction (SVF), and macrophages isolated from eWAT of NC- or HFD-fed C57BL/6 mice ( $n = 5$  per group). Statistical significance was calculated using an unpaired two-tailed *t*-test. Bar graphs represent mean  $\pm$  s.e.m. **c**, Representative western blots for REDD1 expression in eWAT, SVF, skeletal muscles, and liver from NC- or HFD- fed *Redd1*<sup>-/-</sup> mice and WT littermates ( $n = 3$ ). **d**, Representative western blots for REDD1 expression in eWAT, SVF, purified adipocytes, skeletal muscle, and liver from NC- or HFD- fed *Redd1*<sup>Δadipoq</sup> (*R*<sup>Δadipoq</sup>) and *Redd1*<sup>fl/fl</sup> (*R*<sup>fl/fl</sup>) mice ( $n = 3$ ). **e**, Representative western blots for REDD1 expression in various tissues of NC- or HFD- fed *Redd1*<sup>KKAA</sup> (*R*<sup>KKAA</sup>) mice and their WT littermates ( $n = 3$ ). Source data are provided as a Source Data file.

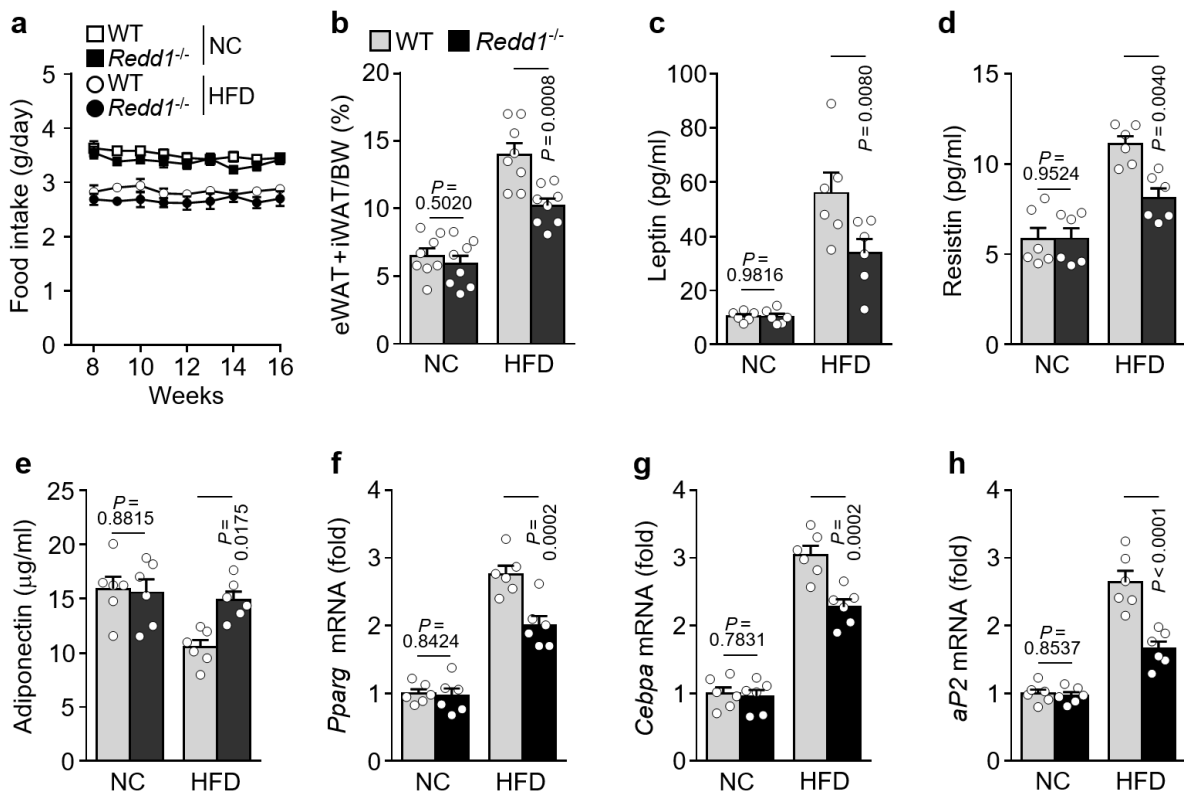

**Supplementary Fig. 2. Changes in food intake, normalized fat mass, adipokine production, and adipogenic gene expression in *Redd1*<sup>-/-</sup> and WT mice.** **a**, Trajectories of daily food intake for *Redd1*<sup>-/-</sup> mice and WT littermates fed NC or HFD between 8 and 16 weeks ( $n = 6$  per group). **b**, Changes in fat (eWAT + iWAT) mass after normalization for body weight (BW) in mice fed NC or HFD for 16 weeks ( $n = 8$  per group). **c–e**, Plasma levels of leptin (**c**), resistin (**d**), and adiponectin (**e**) in mice fed NC or HFD for 16 weeks ( $n = 6$  per group). **f–h**, Expression levels of *Pparg* (**f**), *Cebpa* (**g**), and *aP2* (**h**) in eWAT of mice fed NC or HFD for 10 weeks ( $n = 6$  per group). Data are shown as mean  $\pm$  s.e.m. Statistical significance was calculated using two-way ANOVA followed by the Holm–Sidak post hoc test. Source data are provided as a Source Data file.

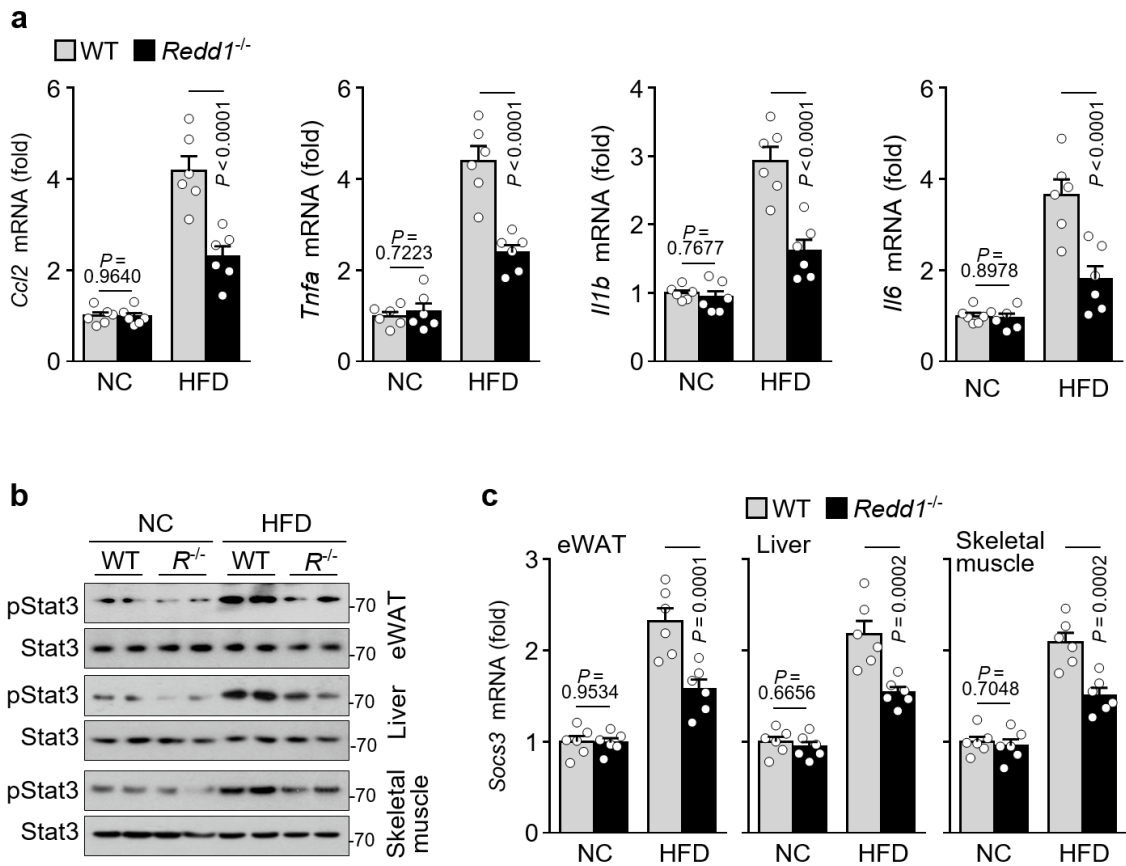

**Supplementary Fig. 3. Expression of proinflammatory cytokines and their downstream signaling pathway in *Redd1*<sup>-/-</sup> and WT mice.** **a**, Expression levels of *Ccl2*, *Tnfa*, *Il1b*, and *Il6* in eWAT of NC- or HFD-fed *Redd1*<sup>-/-</sup> (*R*<sup>-/-</sup>) mice and WT littermates ( $n = 6$  per group). **b**, Representative western blots of phosphorylated Stat3 in various tissues of NC- or HFD-fed mice ( $n = 3$ ). **c**, qRT-PCR-based quantification of *Socs3* levels in various tissues of NC- or HFD-fed mice ( $n = 6$  per group). Data are shown as mean  $\pm$  s.e.m. Statistical significance was calculated using two-way ANOVA followed by the Holm–Sidak post hoc test. Source data are provided as a Source Data file.

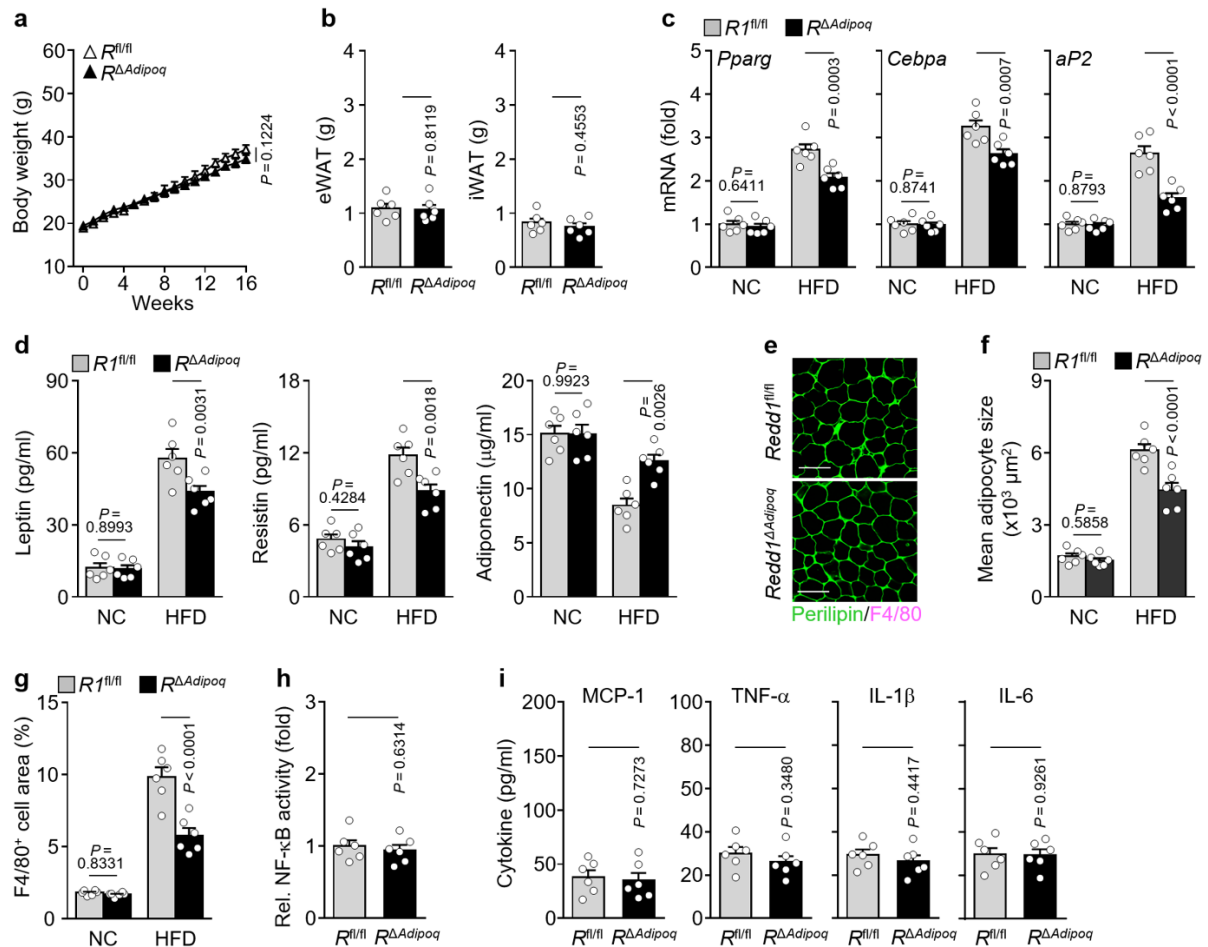

**Supplementary Fig. 4. Effects of adipocyte *Redd1* deletion on adipogenesis and inflammation.** **a**, Weight gain over time in *Redd1*<sup>fl/fl</sup> ( $R^{fl/fl}$ ) and *Redd1* <sup>$\Delta$ Adipoq</sup> ( $R^{\Delta Adipoq}$ ) mice fed NC for 16 weeks ( $n = 6$  per group). **b**, Measurements for eWAT and iWAT mass in NC-fed mice ( $n = 6$  per group). **c**, Expression levels of *Pparg*, *Cebpa*, and *aP2* in eWAT of mice fed NC or HFD for 10 weeks ( $n = 6$  per group). **d**, Plasma levels of adipokines in mice fed NC or HFD for 16 weeks ( $n = 6$  per group). **e**, Representative images showing perilipin (green) and F4/80 (purple) staining in eWAT of NC-fed mice ( $n = 6$  per group). Scale bar, 100  $\mu$ m. **f**, Average adipocyte size in eWAT of NC- or HFD-fed mice ( $n = 6$  per group). **g**, Relative area of F4/80-positive cells in eWAT of NC- or HFD-fed mice ( $n = 6$  per group). **h**, NF- $\kappa$ B activity in eWAT from NC-fed mice ( $n = 6$  per group). **i**, Plasma levels of inflammatory cytokines in NC-fed mice ( $n = 6$  per group). Data are shown as mean  $\pm$  s.e.m. Statistical significance was calculated using an unpaired two-tailed *t*-test (**a**, **b**, **h**, **i**) and two-way ANOVA followed by the Holm–Sidak post hoc test (**c**, **d**, **f**, **g**). Source data are provided as a Source Data file.

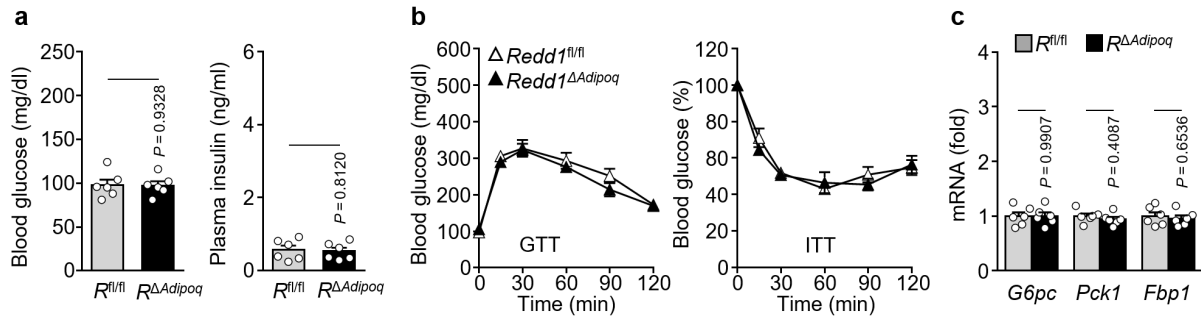

**Supplementary Fig. 5. Effects of adipocyte *Redd1* deletion on insulin resistance and glucose metabolism.** **a**, Fasting plasma levels of glucose and insulin in NC-fed *Redd1<sup>fl/fl</sup>* ( $R^{fl/fl}$ ) and *Redd1<sup>ΔLysM</sup>* ( $R^{\Delta LysM}$ ) ( $n = 6$  per group). **b**, Assessment of GTT and ITT in NC-fed mice fasting for 12 and 6 h, respectively ( $n = 6$  per group). **c**, Relative expression levels of *G6pc*, *Pck1*, and *Fbp1* in the liver of NC-fed mice ( $n = 6$  per group). Bar graphs represent mean  $\pm$  s.e.m. Statistical significance was calculated using an unpaired two-tailed *t*-test. Source data are provided as a Source Data file.

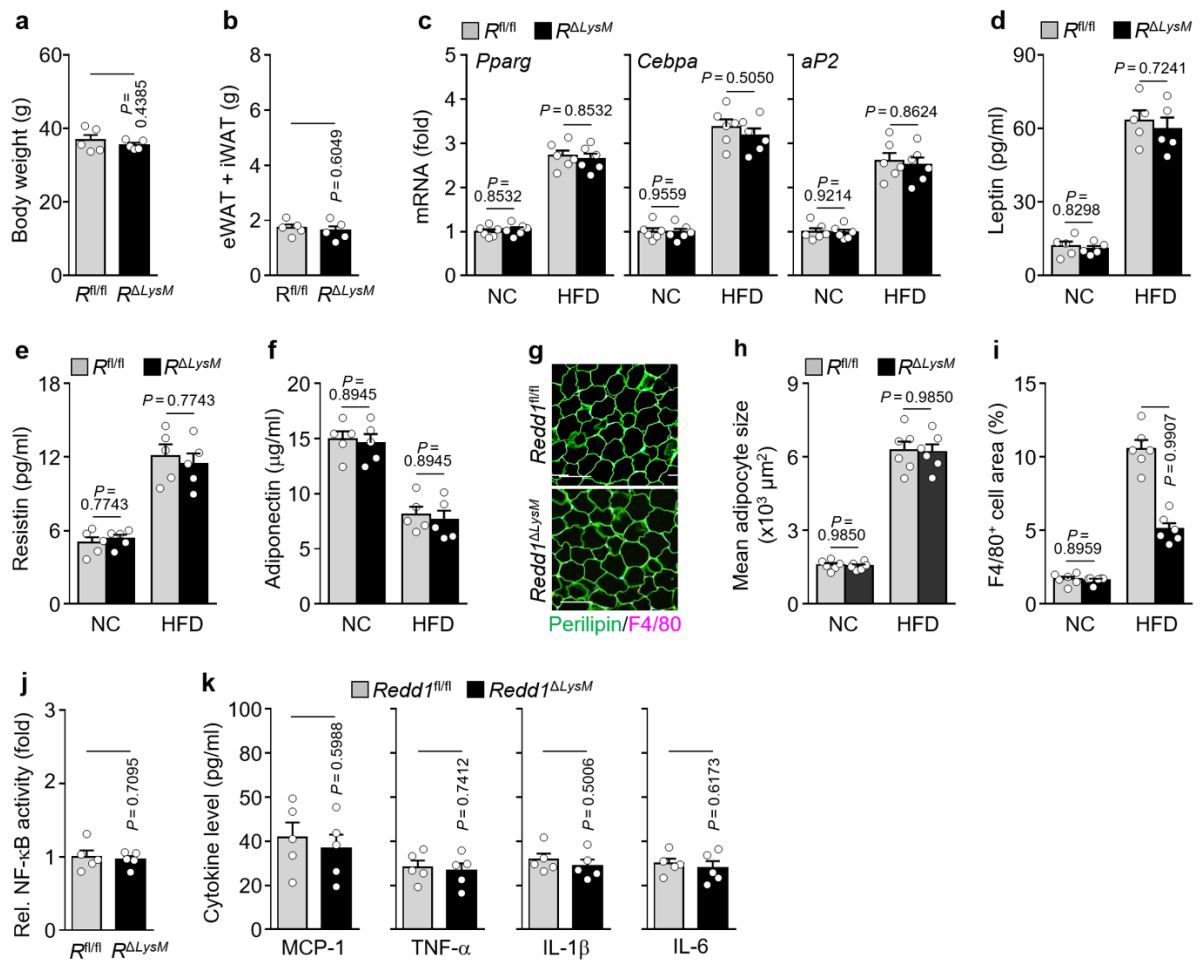

**Supplementary Fig. 6. Effects of myeloid *Redd1* deletion on adipogenesis and inflammation.** **a**, Weight gain over time in *Redd1*<sup>fl/fl</sup> ( $R^{fl/fl}$ ) and *Redd1* <sup>$\Delta$ LysM</sup> ( $R^{\Delta LysM}$ ) mice fed NC for 16 weeks ( $n = 5$  per group). **b**, Measurements for eWAT + iWAT mass in NC-fed mice ( $n = 5$  per group). **c**, Expression levels of *Pparg*, *Cebpa*, and *aP2* in eWAT of mice fed NC or HFD for 10 weeks ( $n = 6$  per group). **d–f**, Plasma levels of adipokines in mice fed NC or HFD for 16 weeks ( $n = 5$  per group). **g**, Representative images showing perilipin (green) and F4/80 (purple) staining in eWAT of NC-fed mice ( $n = 6$  per group). Scale bar, 100  $\mu$ m. **h, i**, Average adipocyte size (**h**) and relative area of F4/80-positive cells (**i**) in eWAT of NC- or HFD-fed mice ( $n = 6$  per group). **j**, NF- $\kappa$ B activity in eWAT from NC-fed mice ( $n = 5$  per group). **k**, Plasma levels of inflammatory cytokines in NC-fed mice ( $n = 5$  per group). Data are shown as mean  $\pm$  s.e.m. Statistical significance was calculated using an unpaired two-tailed *t*-test (**a, b, j, k**) and two-way ANOVA followed by the Holm–Sidak post hoc test (**c–f, h, i**). Source data are provided as a Source Data file.



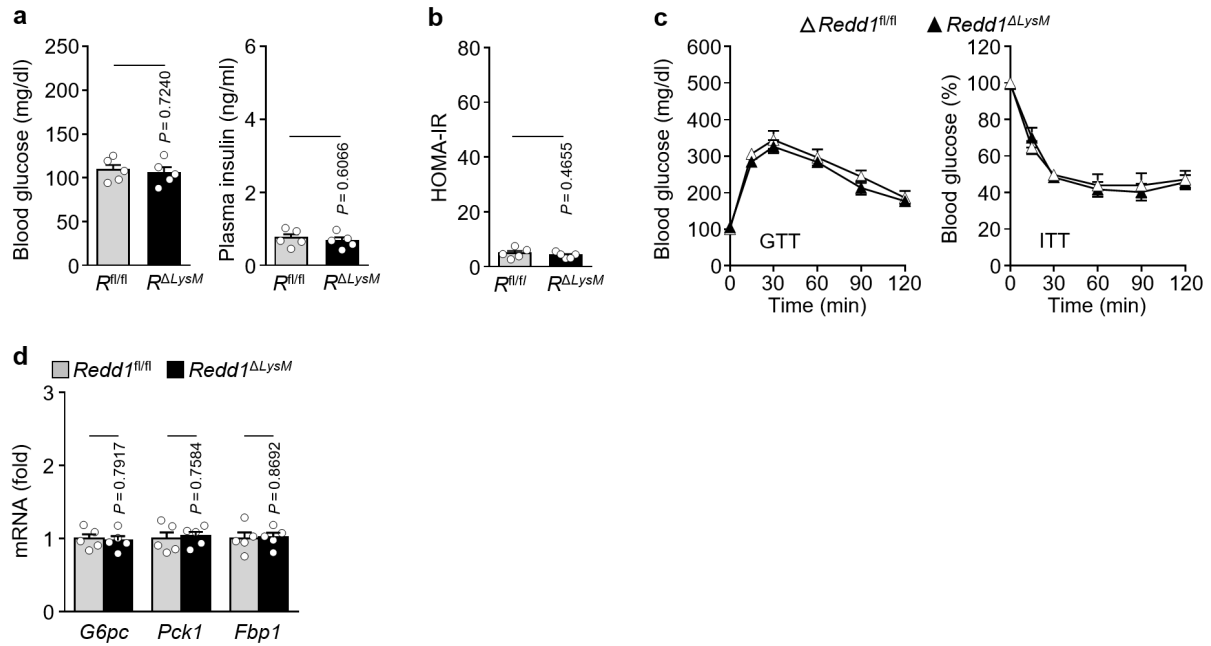

**Supplementary Fig. 7. Effects of myeloid *Redd1* deletion on insulin resistance and glucose metabolism.** **a**, Fasting plasma levels of glucose and insulin in NC-fed *Redd1<sup>fl/fl</sup>* ( $R^{fl/fl}$ ) and *Redd1<sup>ΔLysM</sup>* ( $R^{\Delta LysM}$ ) mice ( $n = 5$  per group). **b**, Calculation of HOMA-IR scores in NC-fed mice ( $n = 5$  per group). **c**, Assessment of GTT and ITT in NC-fed mice fasting for 12 and 6 h, respectively ( $n = 5$  per group). **d**, Expression levels of *G6pc*, *Pck1*, and *Fbp1* in the liver of NC-fed mice ( $n = 5$  per group). Bar graphs represent mean  $\pm$  s.e.m. Statistical significance was calculated using an unpaired two-tailed *t*-test. Source data are provided as a Source Data file.

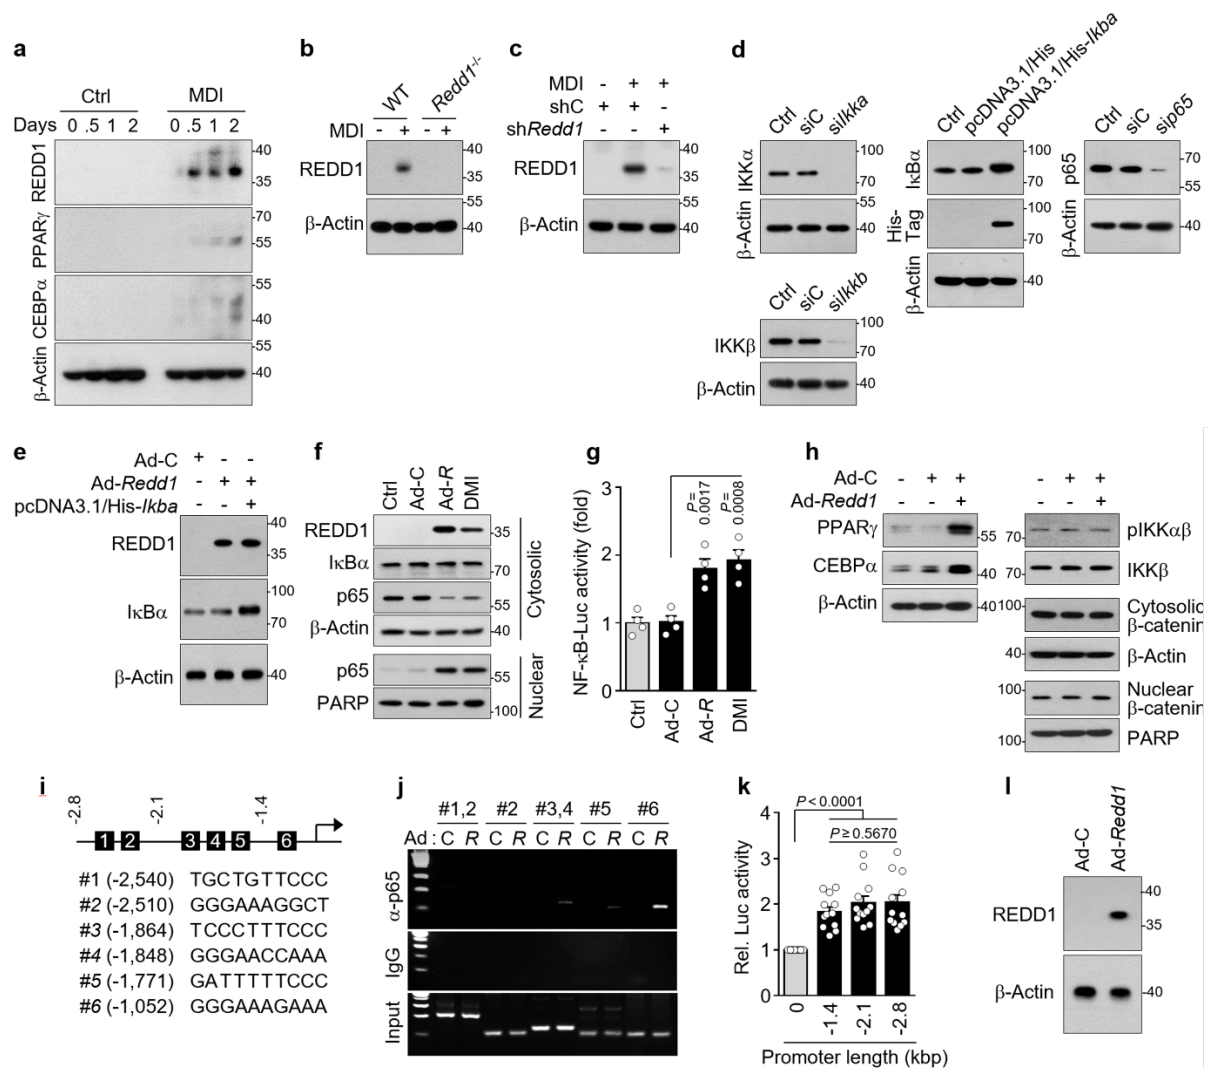

**Supplementary Fig. 8. Effects of REDD1 on NF- $\kappa$ B activation and adipogenic gene expression.** **a**, Expression of REDD1, PPAR $\gamma$ , and CEBP $\alpha$  in SVF cells cultured in a differentiation medium containing MDI ( $n = 3$ ). **b**, Expression of REDD1 in WT and *Redd1*<sup>-/-</sup> SVF cells cultured in MDI medium ( $n = 3$ ). **c**, Expression of REDD1 in 3T3-L1 cells exposed to MDI medium following transfection with shControl (shC) and sh*Redd1* ( $n = 3$ ). **d**, Target gene expression in 3T3-L1 cells transfected either with siRNA for control, *Ikka*, *Ikkb*, or NF- $\kappa$ B *p65* or with pcDNA3.1/His-*Ikba* ( $n = 3$ ). **e**, Expression of REDD1 and I $\kappa$ B $\alpha$  in 3T3-L1 cells transfected with pcDNA3.1/His-*Ikba* or infected with control adenovirus (Ad-C) or adenoviral *Redd1* (Ad-*Redd1*) ( $n = 3$ ). **f**, **g**, NF- $\kappa$ B activation (**f**) and NF- $\kappa$ B-Luc activity (**g**) in 3T3-L1 cells infected with Ad-*Redd1* (Ad-*R*) or cultured in MDI medium ( $n = 4$ ). **h**, Levels of PPAR $\gamma$ , CEBP $\alpha$ , phospho-IKK $\alpha\beta$ , and cytosolic and nuclear  $\beta$ -catenin in 3T3-L1 cells infected with Ad-C and Ad-*R* ( $n = 3$ ). **i**, Schematic diagram showing six putative NF- $\kappa$ B binding sites and their nucleotide sequences in *Cebpa* promoter. **j**, Chip analysis was performed in Ad-C (C) and Ad-*R*(*R*)-infected 3T3-L1 cells using specific primers (Supplementary table 2) ( $n = 3$ ). **k**, *Cebpa* promoter-luciferase activity was assayed in 3T3-L1 cells infected with Ad-C or Ad-*R* ( $n = 10$ ). **l**, Expression of REDD1 in mouse peritoneal macrophages infected with Ad-C and Ad-*Redd1* ( $n = 3$ ).

Luciferase activity (**g**, **k**) represent mean  $\pm$  s.e.m. Statistical significance was calculated using one-way ANOVA followed by the Holm–Sidak post hoc test. Source data are provided as a Source Data file.

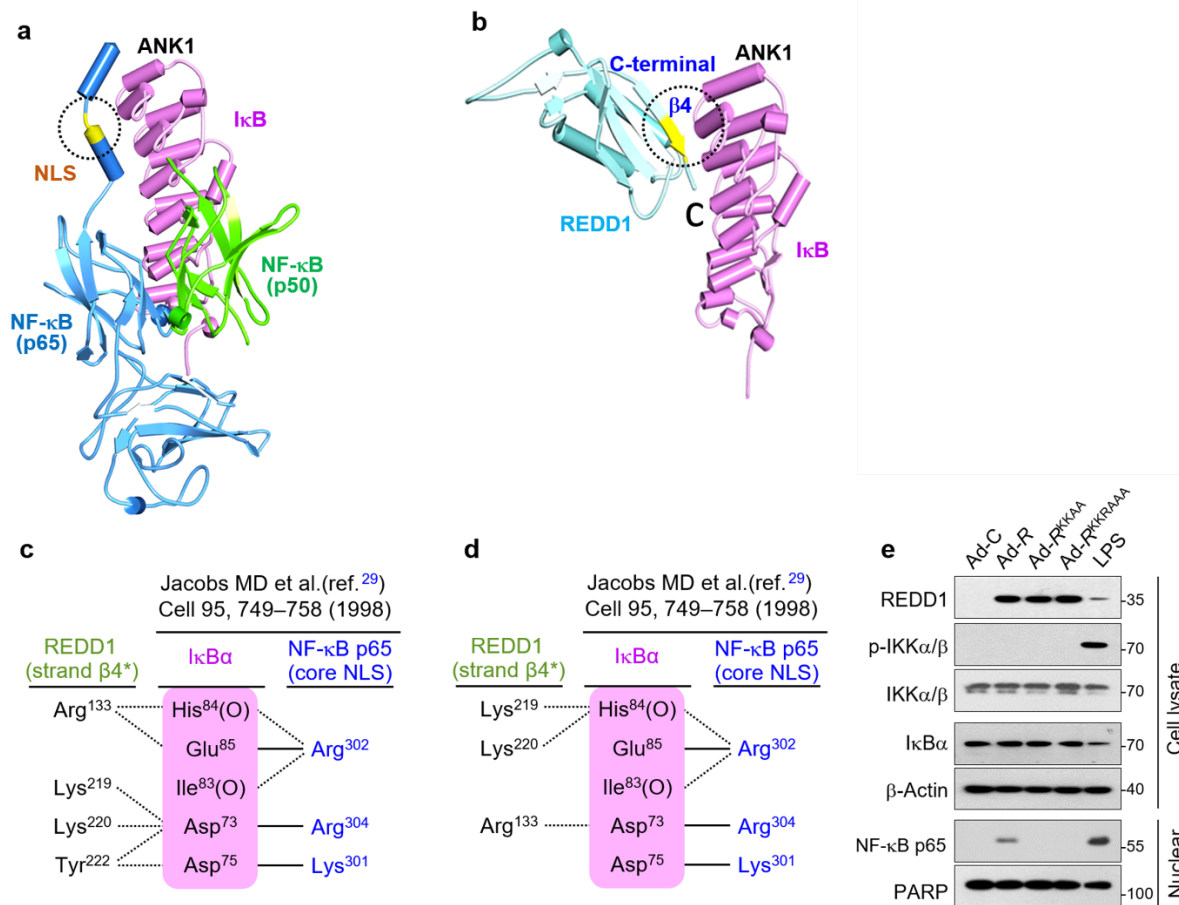

**Supplementary Fig. 9. Computational prediction of interaction sites between IκBα and NLS of NF-κB p65 or strand β4 of REDD1.** **a, b**, The complex structure of IκBα and NF-κB (p65/p50) in the X-ray crystal structure (**a**, ref.<sup>29</sup>) and the predictive binding conformation of IκBα and REDD1 (**b**) using computational protein-protein docking methods. The dotted circle indicates a key binding site. **c, d**, Key residue interactions between IκBα and NF-κB p65 or REDD1 in the protein-protein docking using the HADDOCK (**c**) and HDOCK (**d**) servers, respectively. Solid and dotted lines indicate salt bridges and hydrogen bonds, respectively. **e**, NF-κB activation in 3T3-L1 cells infected with Ad-Redd1 or its mutants or treated with 100 ng/ml lipopolysaccharide (LPS) as a positive control ( $n = 3$ ). Source data are provided as a Source Data file.

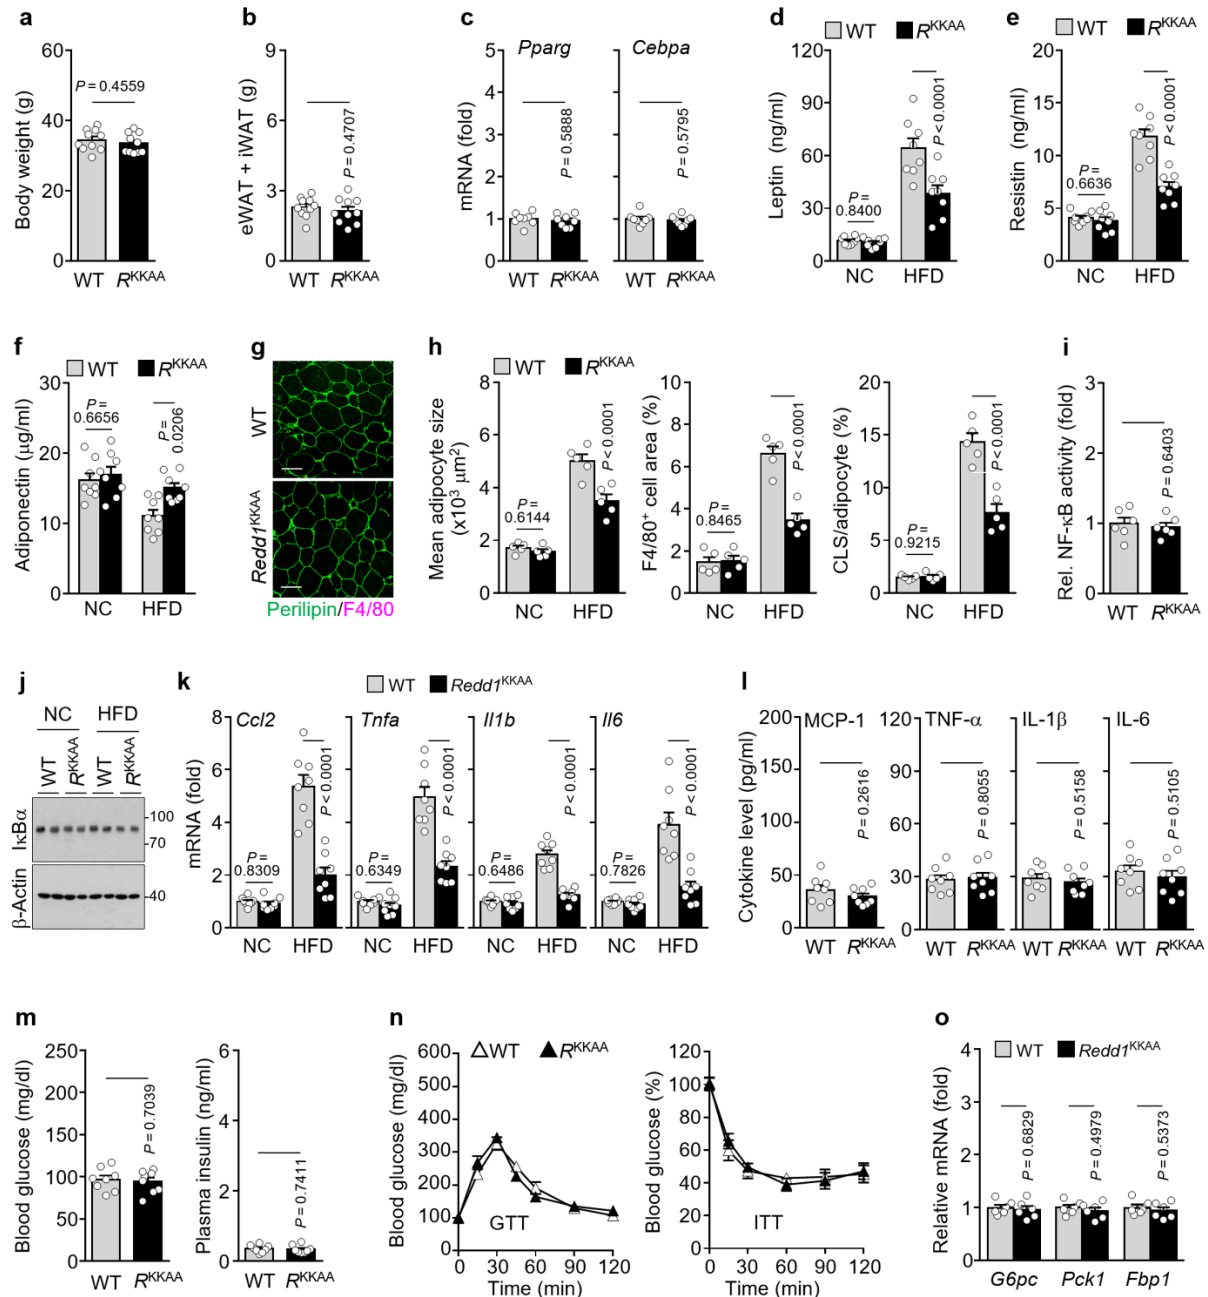

**Supplementary Fig. 10. Effects of  $Redd1^{KKAA}$  on adipogenesis, inflammation, and glucose metabolism.** **a**, Weight gain over time in  $Redd1^{KKAA}$  ( $R^{KKAA}$ ) mice and their WT littermates fed NC for 16 weeks ( $n = 10$  per group). **b**, Measurement for eWAT + iWAT mass in NC-fed mice ( $n = 10$  per group). **c**, Expression levels of *Pparg* and *Cebpa* in eWAT of mice fed NC for 10 weeks ( $n = 8$  per group). **d–f**, Plasma levels of adipokines in mice fed NC or HFD for 16 weeks ( $n = 8$  per group). **g**, Representative images showing perilipin (green) and F4/80 (purple) staining in eWAT of mice fed NC for 16 weeks. Scale bar, 100  $\mu\text{m}$ . **h**, Average adipocyte size, the relative area of F4/80-positive cells, and the relative number of crown-like structures (CLSs) in eWAT of NC- or HFD-fed mice ( $n = 5$  per group). **i**, NF- $\kappa$ B activity in eWAT of NC-fed mice ( $n = 6$  per group). **j**, Representative western blots for I $\kappa$ B $\alpha$  expression in eWAT of NC- or HFD-fed mice. **k**, Expression levels of cytokine genes of NC- or HFD-fed mice ( $n = 8$  per group). **l**, Plasma levels of inflammatory cytokines in NC-fed mice ( $n = 8$

per group). **m**, Fasting plasma levels of glucose and insulin in NC-fed mice ( $n = 8$  per group). **n**, Assessment of GTT and ITT in NC-fed mice after fasting for 12 and 6 h, respectively ( $n = 6$  per group). **o**, Relative expression levels of *G6pc*, *Pck1*, and *Fbp1* in the liver of NC-fed mice ( $n = 6$  per group). Data are shown as mean  $\pm$  s.e.m. Statistical significance was calculated using an unpaired two-tailed *t*-test (**a–c**, **i**, **l**, **m–o**) and two-way ANOVA followed by the Holm–Sidak post hoc test (**d–f**, **h**, **k**). Source data are provided as a Source Data file.

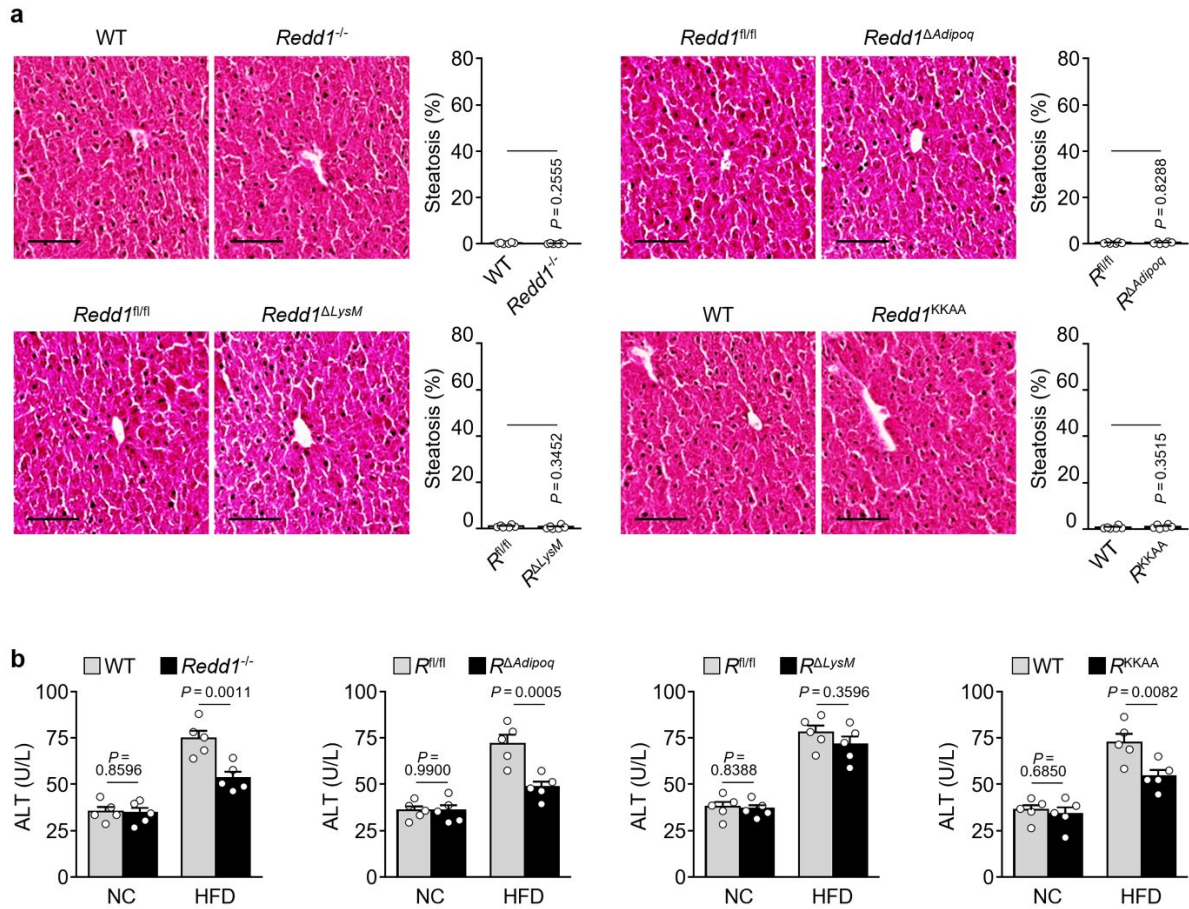

**Supplementary Fig. 11. Effects of *Redd1* deletion on hepatic steatosis.** **a**, Representative images of H&E-stained liver tissues from NC-fed *Redd1*<sup>-/-</sup>, *Redd1*<sup>ΔAdipoq</sup>, *Redd1*<sup>ΔLysM</sup>, *Redd1*<sup>KKAA</sup>, and control mice, and quantification of hepatic steatosis from H&E-stained liver tissues ( $n = 6$  per group). Scale bars, 100  $\mu$ m. **b**, Plasma levels of ALT in NC- or HFD-fed *Redd1*-deficient and control mice ( $n = 6$  per group). Bar graphs represent mean  $\pm$  s.e.m. Statistical significance was calculated using an unpaired two-tailed *t*-test (**a**) and two-way ANOVA followed by the Holm–Sidak post hoc test (**b**). Source data are provided as a Source Data file.

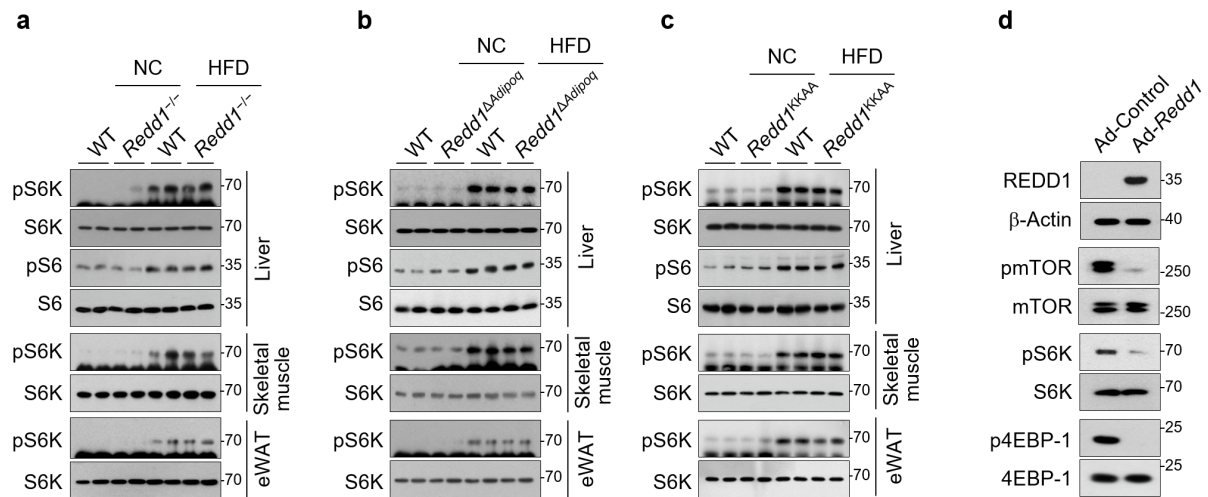

**Supplementary Fig. 12. Effects of *Redd1* deletion or overexpression on the mTOCC1 pathway.** **a–c**, Representative western blots for phosphorylation of the downstream mTORC1 effectors S6K and S6 in the liver, skeletal mice, and eWAT of NC- or HFD-fed *Redd1*<sup>-/-</sup> (**a**), *Redd1*<sup>ΔAdipoq</sup> (**b**), *Redd1*<sup>KKAA</sup> (**c**), and control mice ( $n = 3$ ). **d**, Representative western blots for mTOR, S6K, and 4EBP-1 phosphorylation in 3T3-L1 cells transfected with Ad-C or Ad-*Redd1* ( $n = 3$ ). Source data are provided as a Source Data file.



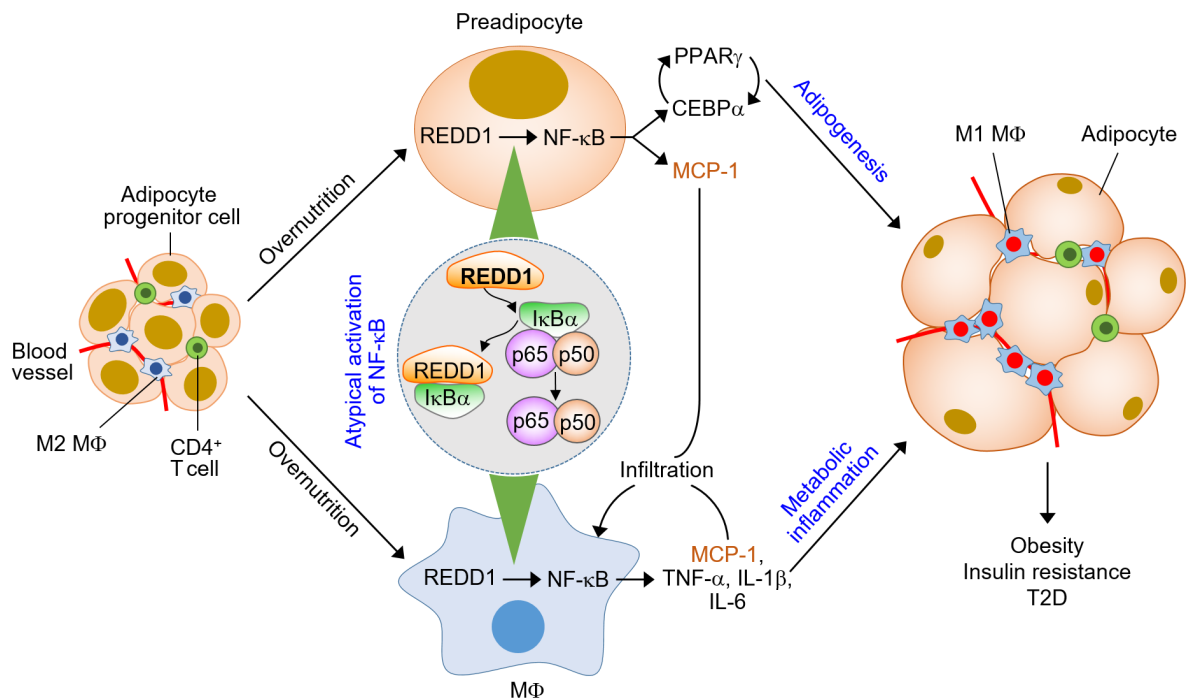

**Supplementary Fig. 13. Proposed model for the role of REDD1–NF- $\kappa$ B axis in adipogenesis and metabolic dysregulation.** REDD1 is induced or upregulated in adipocytes and macrophages of adipose tissue by overnutrition and binds with and sequesters I $\kappa$ B $\alpha$  away from inactive NF- $\kappa$ B complexes in the cytoplasm. The liberated NF- $\kappa$ B dimers translocate to the nucleus to activate target gene expression. NF- $\kappa$ B activated in adipocytes contributes to adipogenesis and obesity through upregulation of PPAR $\gamma$  and CEBP $\alpha$  and stimulates inflammatory gene expression, including MCP-1 that promotes macrophage infiltration into adipose tissue. In macrophages, NF- $\kappa$ B activation results in meta-inflammation and ultimately insulin resistance and T2D.

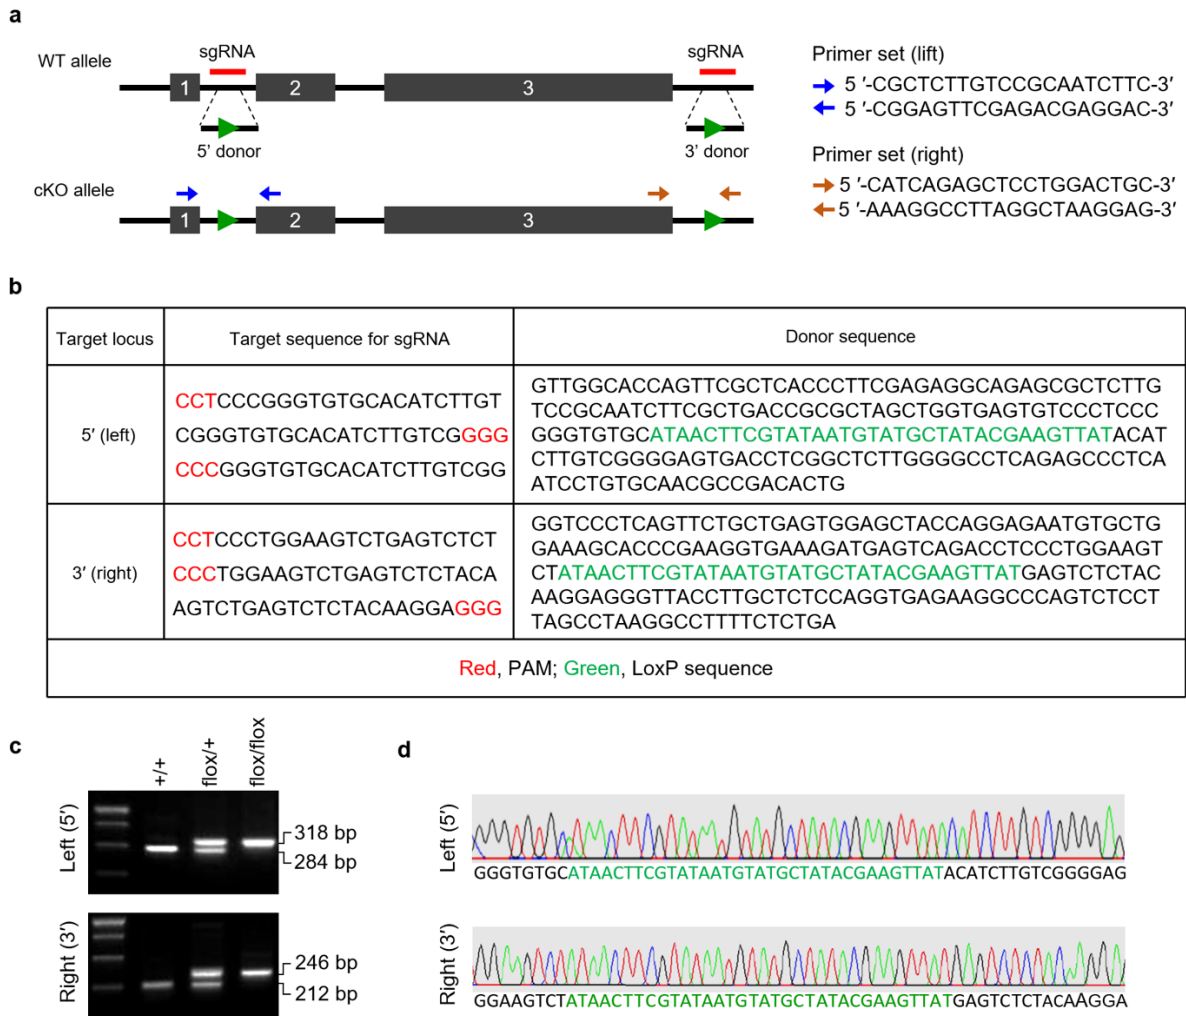

**Supplementary Fig. 14. Generation of *Redd1*<sup>fl/fl</sup> mouse using CRISPR/Cas9-mediated gene editing.**

**a**, A schematic representation of targeting sites in *Redd1*. PCR primer sets capable of verifying the insertion of loxP into left (5') and right (3') positions. **b**, Sequence of sgRNAs and long ssDNA donors containing loxP sequence. **c**, PCR analysis of genomic DNA from WT, *Redd1*<sup>fl/+</sup>, and *Redd1*<sup>fl/fl</sup> mice ( $n = 3$ ). **d**, Confirmation of genomic DNA sequences of inserted loxP into left (5') and right (3') positions. Source data are provided as a Source Data file.

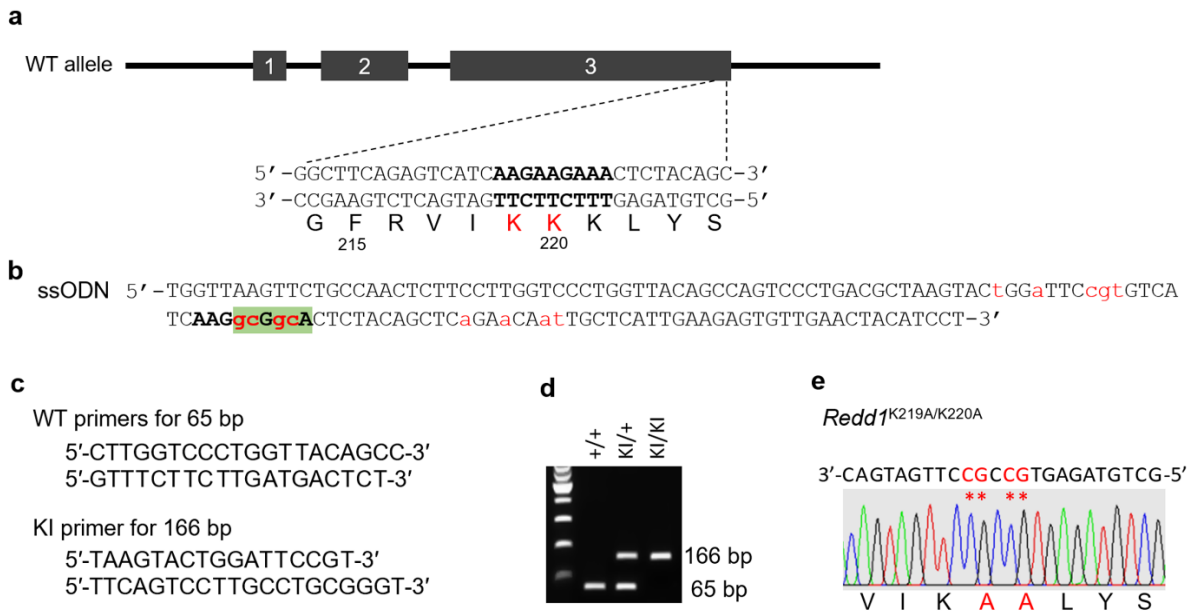

**Supplementary Fig. 15. Generation of *Redd1*<sup>KKAA</sup> mouse using CRISPR/Cas9-mediated gene editing.** **a**, A schematic representation of targeting sites (bold sequence) in *Redd1*. **b**, Sequence of ssODN. The 136-bp ssODN donor template shows the Lys<sup>219</sup>Ala/Lys<sup>220</sup>Ala mutant sequence in the green box. The silent mutations used to prevent re-cutting by Cas9 are represented as small letters in red. **c**, PCR primers used for detection of WT and knock-in (KI) mutant *Redd1*. **d**, PCR analysis of genomic DNA from WT and *Redd1*<sup>KKAA</sup> knock-in mice ( $n = 3$ ). **e**, Confirmation of genomic DNA sequences of *Redd1*<sup>KKAA</sup> mutation. Asterisks indicate knock-in mutations. Source data are provided as a Source Data file.
